# Supplementary material for: Effect of transglutaminase-catalyzed glycosylation on the allergenicity of tropomyosin in the Perna viridis food matrix
Source: Royal Society of Chemistry journal article supplement (doi:10.1039/d4fo02305f), 2024-01-01
Supplement: d4fo02305f1.pdf [file d4fo02305f1.pdf]

**Effect of transglutaminase-catalyzed glycosylation on the allergenicity of tropomyosin in *Perna viridis* food matrix**

Dongxiao Li,<sup>a</sup> Xinrong He,<sup>a</sup> Fajie Li,<sup>a</sup> Yang Yang,<sup>ab</sup> Meng Liu,<sup>ac</sup> Qingmei Liu,<sup>a</sup> Lianzhong Luo,<sup>d</sup> Guixia Chen,<sup>e</sup> Guangming Liu<sup>\*ac</sup>

<sup>a</sup> College of Ocean Food and Biological Engineering, Xiamen Key Laboratory of Marine Functional Food, Fujian Provincial Engineering Technology Research Center of Marine Functional Food, Jimei University, Xiamen, Fujian 361021, China.

<sup>b</sup> College of Environment and Public Health, Xiamen Huaxia University, Xiamen, Fujian 361000, China.

<sup>c</sup> College of Marine Biology, Xiamen Ocean Vocational College, Xiamen, Fujian 361100, China.

<sup>d</sup> Engineering Research Center of Marine Biopharmaceutical Resource Fujian Province University, Xiamen Medical College, Xiamen, Fujian 361023, China.

<sup>e</sup> Women and Children's Hospital Affiliated to Xiamen University, Xiamen, Fujian 361003, China.

E-mail: [gmliu@jmu.edu.cn](mailto:gmliu@jmu.edu.cn); Fax: +86-0592-6180470; Tel: +86-0592-7769301

**Tab. S1. Specific IgE levels and symptoms of the *Perna viridis*-sensitive patients.**

| No. | Age | Sex    | TM-sIgE (OD <sub>450</sub> ) | Symptoms               |
|-----|-----|--------|------------------------------|------------------------|
| S1  | 27  | Female | 0.21                         | Allergic dermatitis    |
| S2  | 19  | Male   | 0.17                         | Diarrhea               |
| S3  | 25  | Female | 0.19                         | Eczema                 |
| S4  | 16  | Male   | 0.17                         | Cough                  |
| S5  | 19  | Male   | 0.15                         | Allergic dermatitis    |
| S6  | 27  | Female | 0.16                         | Diarrhea               |
| S7  | 16  | Male   | 0.18                         | Eczema                 |
| S8  | 26  | Female | 0.17                         | Rash all over the body |
| S9  | 28  | Female | 0.18                         | Allergic dermatitis    |
| S10 | 20  | Male   | 0.21                         | Urticaria              |
| S11 | 24  | Female | 0.15                         | Nausea                 |
| S12 | 20  | Male   | 0.16                         | Allergic dermatitis    |
| S13 | 5   | Male   | 0.04                         | No allergy symptoms    |
| S14 | 30  | Female | 0.05                         | No allergy symptoms    |

The OD<sub>450</sub> value of positive sera is three times or more than that of negative sera.

**Tab. S2 Summary of predicted regions for IgE linear epitopes of TM**

| <b>Bioinformatics tool</b> | <b>Amino acid regions</b>                                                                                                                                                                                                                        |
|----------------------------|--------------------------------------------------------------------------------------------------------------------------------------------------------------------------------------------------------------------------------------------------|
| Immunomedicine<br>Group    | 43-49, 60-70, 83-96, 166-176, 181-211, 243-255, 266-272                                                                                                                                                                                          |
| ABC-pred                   | 6-21, 12-27, 24-39, 36-51, 48-63, 64-79, 75-90, 82-97, 89-104, 96-111, 106-121, 117-132, 128-143, 134-149, 142-157, 149-164, 155-170, 161-176, 168-183, 176-191, 182-197, 192-207, 201-216, 215-230, 221-236, 237-252, 243-258, 258-273, 267-282 |
| IEDB                       | 29-42, 68-85, 105-126, 134-143, 153-165, 209-224, 233-245, 265-269, 271-273                                                                                                                                                                      |
| DNA Star                   | 14-43, 49-60, 63-65, 69-84, 88-90, 102-107, 112-129, 133-150, 157-164, 210-225, 227-246, 248-257, 259-268                                                                                                                                        |
| NetMHCII version 2.3       | 4-13, 43-51, 93-101, 195-206, 224-233                                                                                                                                                                                                            |
